# Supplementary material
Source: PubMed Central journal article supplement (PMC3129367)

# Figure-S1(Scholey)

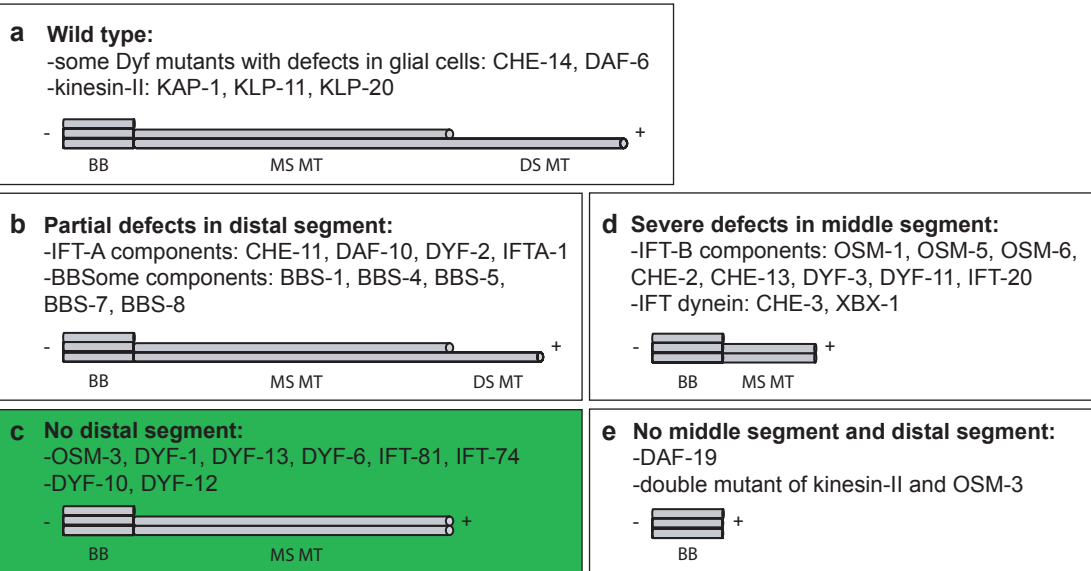

Supplement: NIHMS290935-supplement-1.pdf [file NIHMS290935-supplement-1.pdf]

# Figure-S2(Scholey)

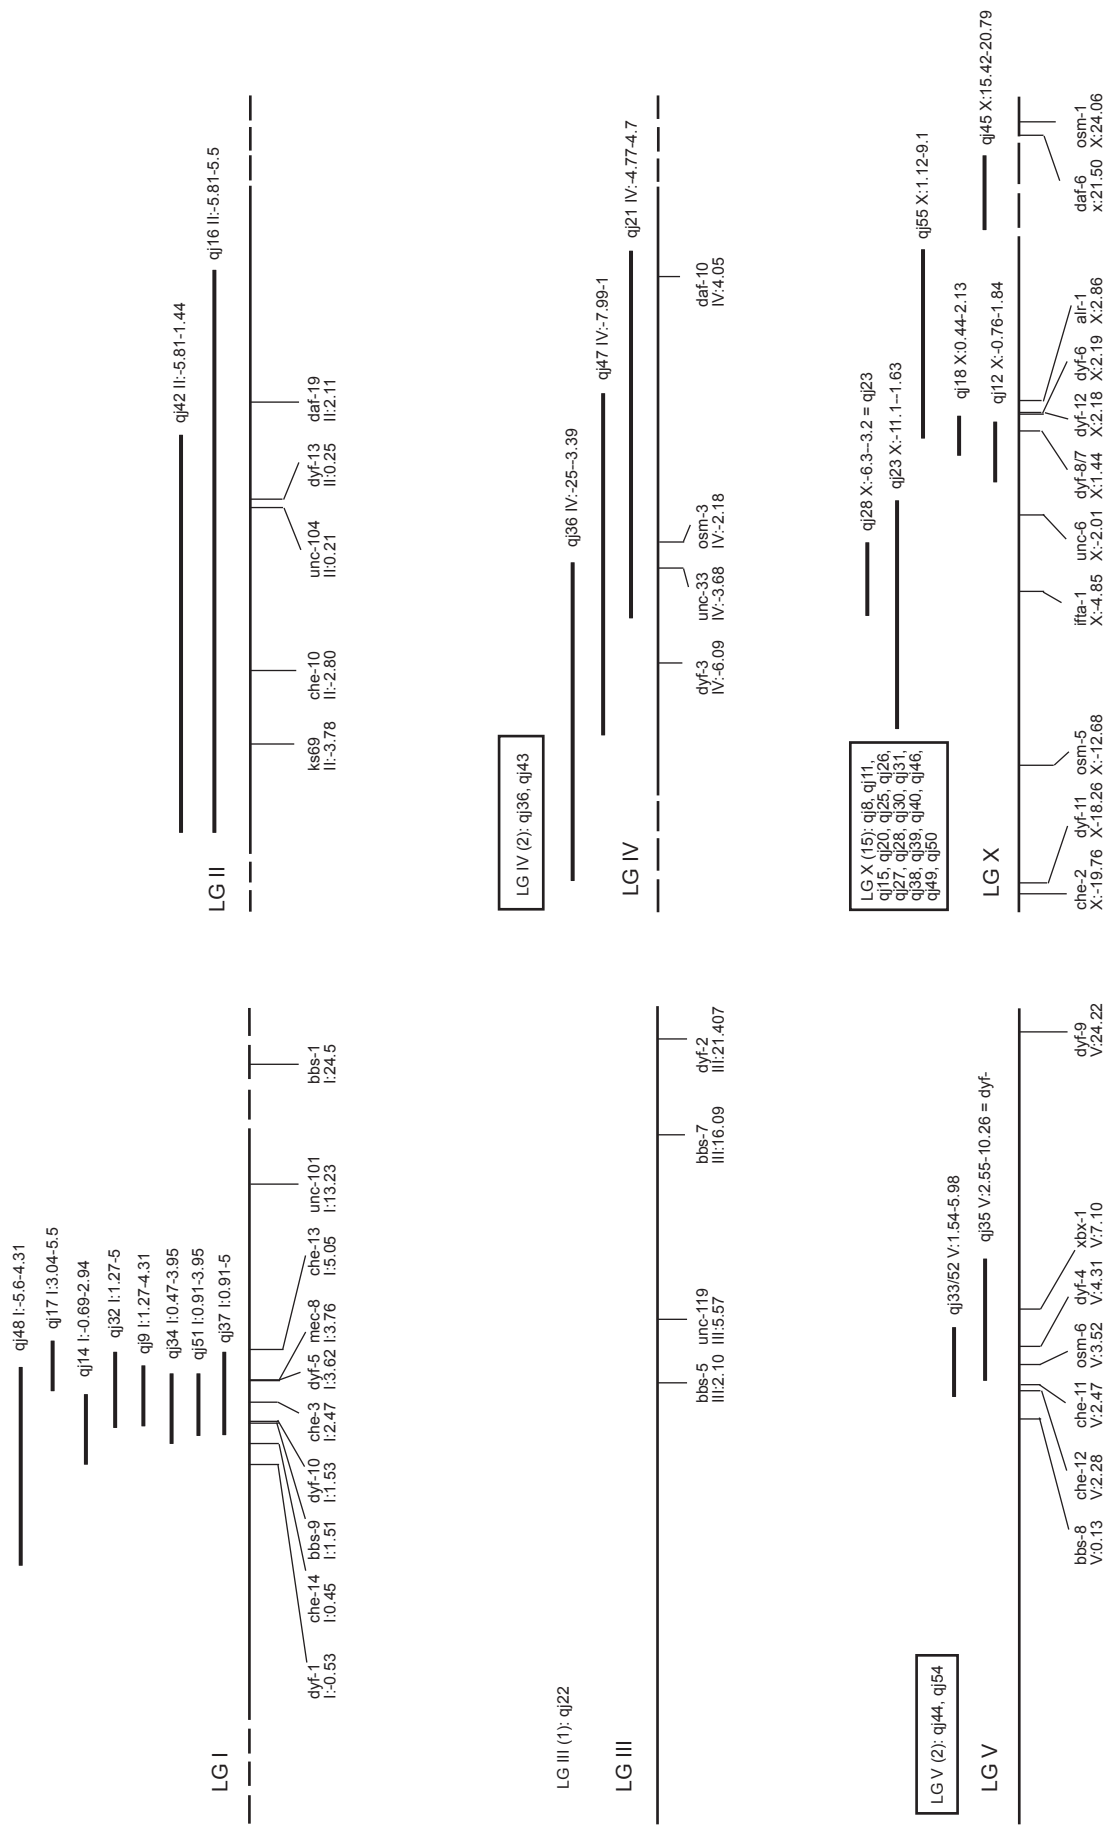

Supplement: NIHMS290935-supplement-2.pdf [file NIHMS290935-supplement-2.pdf]

# Figure-S3(Scholey)

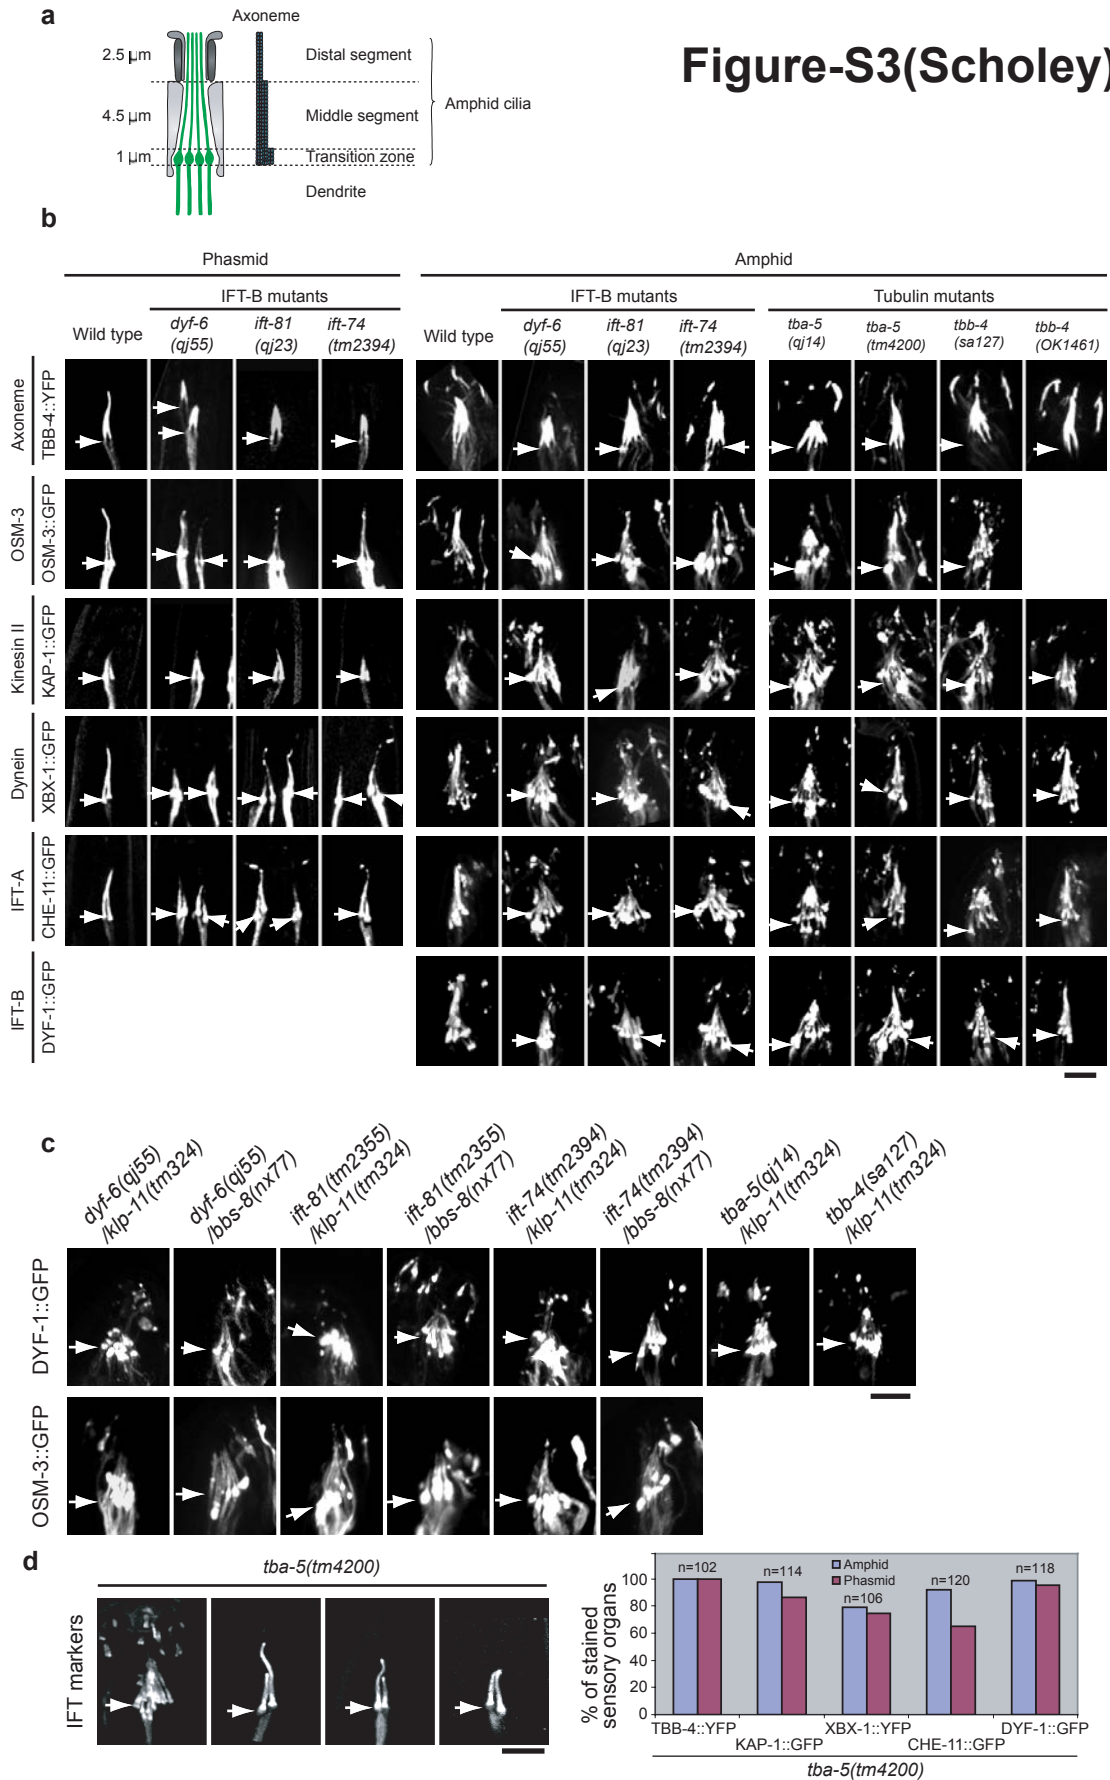

Supplement: NIHMS290935-supplement-3.pdf [file NIHMS290935-supplement-3.pdf]

# Figure-S4(Scholey)

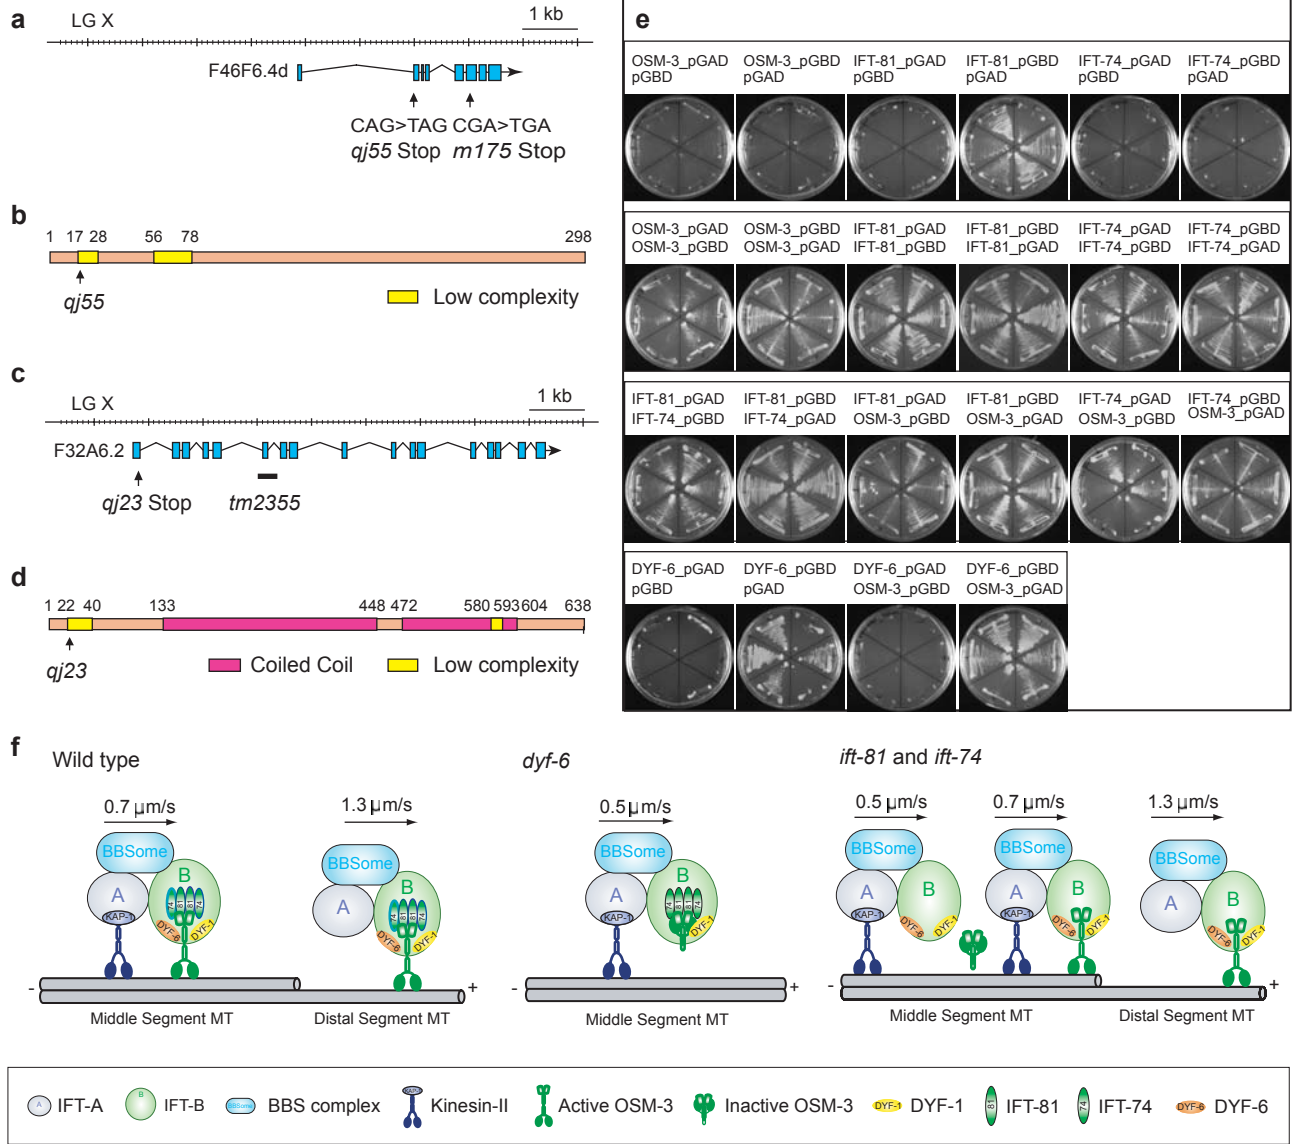

Supplement: NIHMS290935-supplement-4.pdf [file NIHMS290935-supplement-4.pdf]

# Figure-S5(Scholey)

**a**

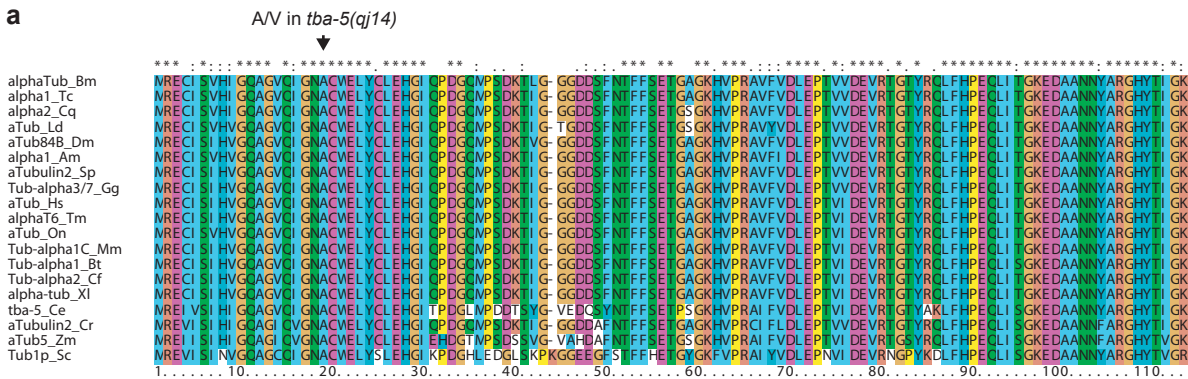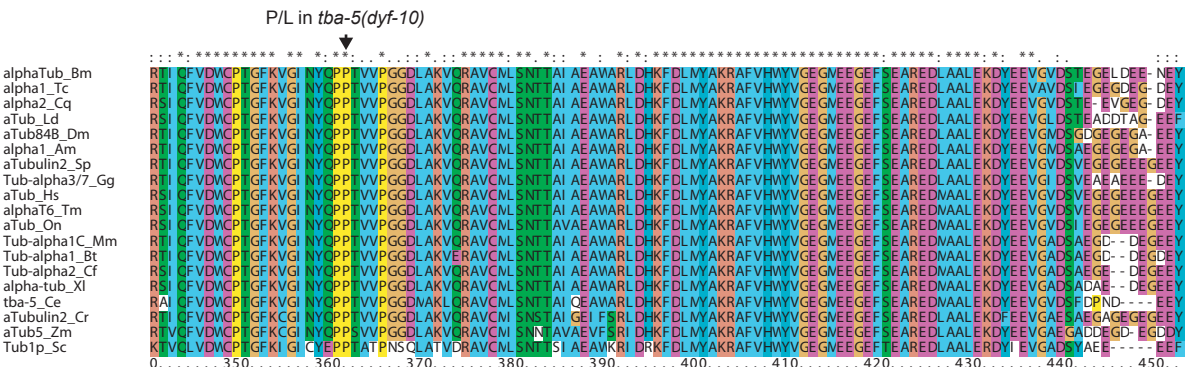

**b**

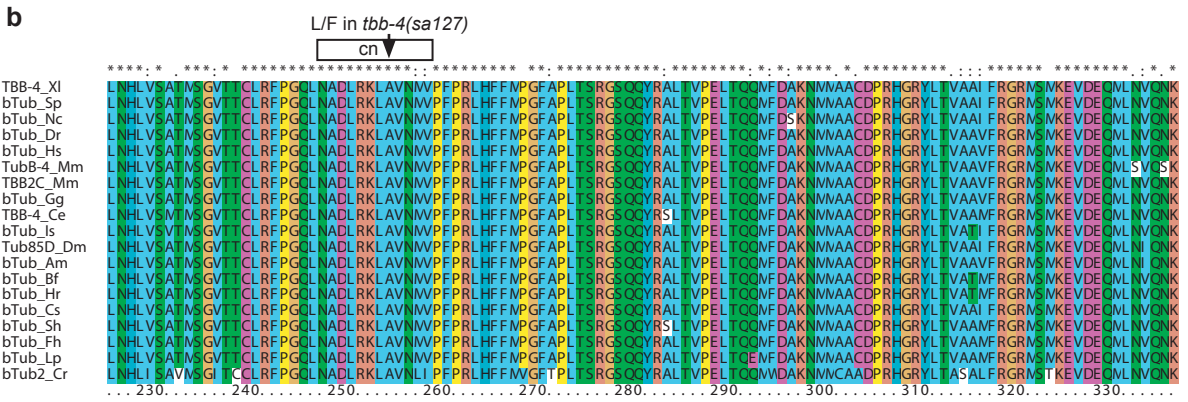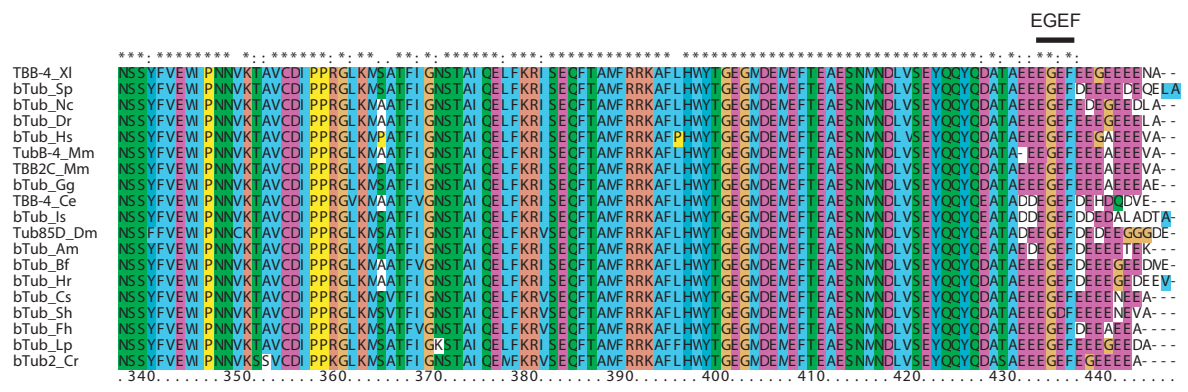

Supplement: NIHMS290935-supplement-5.pdf [file NIHMS290935-supplement-5.pdf]
